# Supplementary material for: Separation and quantification of dead species in styrene RAFT polymerization by gradient polymer elution chromatography
Source: Royal Society of Chemistry journal article supplement (doi:10.1039/c2py20102j), 2012-01-01
Supplement: c2py20102j.pdf [file c2py20102j.pdf]

**Supporting Information for:**

**Separation and Quantification of Dead Species in Styrene RAFT  
Polymerization by Gradient Polymer Elution Chromatography**

**Ruiwei Guo, Zhipeng Shi, Xingxing Wang, Anjie Dong, Jianhua Zhang\***

Department of Polymer Science and Engineering, School of Chemical Engineering and  
Technology, Tianjin University, Tianjin, 300072, China

jhuazhang@tju.edu.cn

The experimental and characterization data for BDB-mediated polystyrene in THF at 60 °C were shown in Table S1. In the sample 3, 4, 5, 6 and 7, the PDI values of PSt were rather high. This is due to the fact that the RAFT polymerization was carried out in the presence of excessive AIBN. The ratio of [AIBN] to [RAFT agent] in the specifically designed experiments was over 1.

Table S1. Experimental and characterization data for BDB-mediated polystyrene in THF at 60 °C<sup>a</sup>

| Sample | [St]:[BDB]:[AIBN] | <i>t</i> (h) | Conv. (%) | <i>M</i> <sub>n</sub> <sup>b</sup> × 10 <sup>-3</sup> | <i>M</i> <sub>w</sub> <sup>b</sup> × 10 <sup>-3</sup> | PDI <sup>c</sup> |
|--------|-------------------|--------------|-----------|-------------------------------------------------------|-------------------------------------------------------|------------------|
| 1      | 500:10:2.5        | 24           | 70.21     | 3.80                                                  | 4.37                                                  | 1.15             |
| 2      | 500:10:5.0        | 24           | 92.74     | 4.40                                                  | 5.94                                                  | 1.35             |
| 3      | 500:10:10         | 24           | 85.03     | 4.31                                                  | 6.20                                                  | 1.44             |
| 4      | 500:10:15         | 24           | 90.35     | 4.89                                                  | 7.83                                                  | 1.60             |
| 5      | 500:10:20         | 24           | 87.68     | 3.96                                                  | 6.65                                                  | 1.68             |
| 6      | 500:2.5:5.0       | 24           | 96.80     | 17.06                                                 | 29.34                                                 | 1.72             |
| 7      | 500:5.0:5.0       | 24           | 88.37     | 6.41                                                  | 10.20                                                 | 1.59             |
| 8      | 500:20:5.0        | 24           | 78.46     | 2.09                                                  | 2.57                                                  | 1.23             |
| 9      | 500:40:5.0        | 24           | 75.22     | 1.18                                                  | 1.43                                                  | 1.21             |
| 10     | 500:10:5.0        | 2            | 11.02     | 1.27                                                  | 1.58                                                  | 1.24             |
| 11     | 500:10:5.0        | 4            | 17.89     | 1.70                                                  | 2.16                                                  | 1.27             |
| 12     | 500:10:5.0        | 6            | 34.51     | 1.92                                                  | 2.32                                                  | 1.21             |
| 13     | 500:10:5.0        | 8            | 42.57     | 2.38                                                  | 2.93                                                  | 1.23             |
| 14     | 500:10:5.0        | 12           | 55.43     | 2.60                                                  | 3.41                                                  | 1.31             |
| 15     | 500:10:5.0        | 16           | 75.82     | 3.27                                                  | 4.35                                                  | 1.33             |
| 16     | 500:10:5.0        | 24           | 92.74     | 4.40                                                  | 5.94                                                  | 1.35             |

<sup>a</sup>[St]= 5.0 × 10<sup>-3</sup> mol/mL; <sup>b</sup>Determined by GPC; <sup>c</sup>PDI=*M*<sub>w</sub>/*M*<sub>n</sub>
